# Supplementary material for: Genetic and Metabolomic Dissection of the Ergothioneine and Selenoneine Biosynthetic Pathway in the Fission Yeast, S. pombe, and Construction of an Overproduction System
Source: PLoS One. 2014 May 14;9(5):e97774. doi: 10.1371/journal.pone.0097774 (PMC4020840; doi:10.1371/journal.pone.0097774)
Supplement: Table S4 — Locations and amino acid sequences of conserved protein domains of Egt1 homologs shown in Table 2 and Figure S4. (XLSX) [file pone.0097774.s015.xlsx]

## Sheet: S. pombe Egt1 homologs
Supplemental Table S4. Locations and amino acid sequences of conserved protein domains of Egt1 homologs shown in Table 2 and Supplementary Figure S4.
Species	Locus name	Gene name	NCBI Accession #	Annotation using NCBI Conserved Domains Database (CDD)1				Amino acid sequence	% identity2
				Domain	Start	End	Length
S. pombe	SPBC1604.01	Egt1	CAA22334	Whole protein	1	773	773	MTEIENIGALEVLFSPESIEQSLKRCQLPSTLLYDEKGLRLFDEITNLKEYYLYESELDILKKFSDSIANQLLSPDLPNTVIELGCGNMRKTKLLLDAFEKKGCDVHFYALDLNEAELQKGLQELRQTTNYQHVKVSGICGCFERLLQCLDRFRSEPNSRISMLYLGASIGNFDRKSAASFLRSFASRLNIHDNLLISFDHRNKAELVQLAYDDPYRITEKFEKNILASVNAVFGENLFDENDWEYKSVYDEDLGVHRAYLQAKNEVTVIKGPMFFQFKPSHLILIEESWKNSDQECRQIIEKGDFKLVSKYESTIADYSTYVITKQFPAMLQLPLQPCPSLAEWDALRKVWLFITNKLLNKDNMYTAWIPLRHPPIFYIGHVPVFNDIYLTKIVKNKA…
				Methyltransferase	16	322	307	PESIEQSLKRCQLPSTLLYDEKGLRLFDEITNLKEYYLYESELDILKKFSDSIANQLLSPDLPNTVIELGCGNMRKTKLLLDAFEKKGCDVHFYALDLNEAELQKGLQELRQTTNYQHVKVSGICGCFERLLQCLDRFRSEPNSRISMLYLGASIGNFDRKSAASFLRSFASRLNIHDNLLISFDHRNKAELVQLAYDDPYRITEKFEKNILASVNAVFGENLFDENDWEYKSVYDEDLGVHRAYLQAKNEVTVIKGPMFFQFKPSHLILIEESWKNSDQECRQIIEKGDFKLVSKYESTIADYSTY
				DUF2260	198	323	126	SFDHRNKAELVQLAYDDPYRITEKFEKNILASVNAVFGENLFDENDWEYKSVYDEDLGVHRAYLQAKNEVTVIKGPMFFQFKPSHLILIEESWKNSDQECRQIIEKGDFKLVSKYESTIADYSTYV
				DinB_23	347	483	137	ALRKVWLFITNKLLNKDNMYTAWIPLRHPPIFYIGHVPVFNDIYLTKIVKNKATANKKHFWEWFQRGIDPDIEDPSKCHWHSEVPESWPSPDQLREYEKESWEYHIVKLCKAMDELSTSEKRILWLCYEHVAMHVET
				HX3HXE motif	476	482	7	HVAMHVE
				FGE-sulfatase	560	772	213	FAWDNEKPMRKKLVSSFSIANRPISNGEYLDFINKKSKTERVYPKQWAEIDGTLYIRTMYGLLPLDDYLGWPVMTSYDDLNNYASSQGCRLPTEDELNCFYDRVLERTDEPYVSTEGKATGFQQLHPLALSDNSSNQIFTGAWEWTSTVLEKHEDFEPEELYPDYTRDFFDGKHNVVLGGSFATATRISNRRSFRNFYQAGYKYAWIGARLVK
S. japonicus	SJAG_00832		EEB05804	Whole protein	1	758	758	MMAESIIDIGATADIFSAQSVSANLKQSRLSSSLLYDETGLQLFGQITQEDEYYPFRLEMQLLQKHADWIAEHVRSKTSTTIILELGCGSMRKTKVLLDAFENTCSPVHYYALDLNRKELQNSLNTLEASTSYRNVKISGICGCFKHALSYLPILRSSPNSKFVLTYLGSSIGNFSREESATFLQAFSSKLKPDDQIIVSFDHRHEKETIISAYNDKHHITEKFELNILNHVNHIFGARLFHLDDWRYQGEYDEHTGVHKAFLISKRPVTIPELQLSFPQNHKLLCEESWKSSSEEANKILHNGGFFTEAELKSNHGFSLFIASVPTFDVSRNPETPCPTLEEWTQIRLAWLYLVFKLYPRDLYFTELIPVRHPFIFYIGHVPAFNDIYLARLTDGKPT…	0.502
				Methyltransferase	6	311	306	IIDIGATADIFSAQSVSANLKQSRLSSSLLYDETGLQLFGQITQEDEYYPFRLEMQLLQKHADWIAEHVRSKTSTTIILELGCGSMRKTKVLLDAFENTCSPVHYYALDLNRKELQNSLNTLEASTSYRNVKISGICGCFKHALSYLPILRSSPNSKFVLTYLGSSIGNFSREESATFLQAFSSKLKPDDQIIVSFDHRHEKETIISAYNDKHHITEKFELNILNHVNHIFGARLFHLDDWRYQGEYDEHTGVHKAFLISKRPVTIPELQLSFPQNHKLLCEESWKSSSEEANKILHNGGFFTEAE	0.4762
				DUF2260	200	321	122	SFDHRHEKETIISAYNDKHHITEKFELNILNHVNHIFGARLFHLDDWRYQGEYDEHTGVHKAFLISKRPVTIPELQLSFPQNHKLLCEESWKSSSEEANKILHNGGFFTEAELKSNHGFSLF	0.4344
				DinB_2	355	480	126	VFKLYPRDLYFTELIPVRHPFIFYIGHVPAFNDIYLARLTDGKPTLGRKDYWDWFQRGIDPDLDNTKKCHWHSQPPEKWPSVEEVNEYERNVWSRLVSIYKQGEMSANMQRAMWMIYEHTAMHLET	0.5
				HX3HXE motif	473	479	7	HTAMHLE
				FGE-sulfatase	510	752	243	PTWVRVPESFITMGIPTTADGKETFYYGWDNEKPERQVSVRCFEIANRPISNGEYLSFLKETTQSKEEFEAAIPKTWLLKDEMLFAKSMYGPLPIEHVLGWPVATSYDELKQYANAKGCRLPTDYELRAFYDHVLKPNEETYVDTAGYATAFQQWYPKSLQDEEKPQIYTGLWEWTSTVLKEDLDFTPEELYPDYTRDFFDGKHNVVMGGSFTTVARIANRRSFRNFYQRKYPYAWIGARLVK	0.6244
S. octosporus	SOCG_01424		EPX71206	Whole protein	1	767	767	MISNNIINIGSLEVLFSPEIIEQCLKVCQLPTSLLYDEKGLQLFDKITGTEEYYLFDCELSILQRDSDAIAQELLSPDLPNTVVELGCGAMHKTKHLLDAFERTGKDVNFYALDLNEDELRRGLSQLEQHASYKHVKVAGICGCFDMFLKNIDKFRGSSNGQISILYLGSSIGNFNRDSATKFIKSFSDRLAIGDKFLLSFDHRNSAELVERAYDDSTRVTETFEKNILTSANRVFGEDLFNENDWDYVSKYEEDLGVHRAYLRAKKDLTIAKGPMVFNFKAGHLLLCEESWKSNDNECREIIHNGNFVVDNVHTNTTPSYSVYVGSKSFPILPQIPKEASISLEEWSQTRDIWLFVTNKLLNDSNIFNVWIPLRHPFIFYMGHIPVFNDIYLSRIFEN…	0.6243
				Methyltransferase	6	324	319	IINIGSLEVLFSPEIIEQCLKVCQLPTSLLYDEKGLQLFDKITGTEEYYLFDCELSILQRDSDAIAQELLSPDLPNTVVELGCGAMHKTKHLLDAFERTGKDVNFYALDLNEDELRRGLSQLEQHASYKHVKVAGICGCFDMFLKNIDKFRGSSNGQISILYLGSSIGNFNRDSATKFIKSFSDRLAIGDKFLLSFDHRNSAELVERAYDDSTRVTETFEKNILTSANRVFGEDLFNENDWDYVSKYEEDLGVHRAYLRAKKDLTIAKGPMVFNFKAGHLLLCEESWKSNDNECREIIHNGNFVVDNVHTNTTPSYSVY	0.6319
				DUF2260	200	325	126	SFDHRNSAELVERAYDDSTRVTETFEKNILTSANRVFGEDLFNENDWDYVSKYEEDLGVHRAYLRAKKDLTIAKGPMVFNFKAGHLLLCEESWKSNDNECREIIHNGNFVVDNVHTNTTPSYSVYV	0.627
				DinB_23	354	485	132	WLFVTNKLLNDSNIFNVWIPLRHPFIFYMGHIPVFNDIYLSRIFENPATASKREYWDWFQRGIDPDVENPEQCHWHSQTPPKWPSPNELRSYEVASWQNHILKLLDGSHALSPSQKRILWLCYEHVAMHIET	0.6591
				HX3HXE motif	478	484	7	HVAMHIE
				FGE-sulfatase	551	765	215	EFFGWDNEKPLRMKQIPSFQIANRPISNGEYLDYLESKPADDKHYPKSWKVIDGKLYVTTMYGLLPLESYHSWPVMASFEELNDYAASKGCRLPTEEELNHFYDHVLHRKSETYVSTKGMATGFQQLHPANLKDDGTHQIFTGAWEWSSTVLDKHEGFEPEALYPDYTKDFFDGKHNVVLGGSFATVPRIANRRSFRNFYQRQYQYAWITARLAK	0.7042
N. crassa	NCU04343	NcEgt-1	EAA27088	Whole protein	1	876	876	MPSAESMTPSSALGQLKATGQHVLSKLQQQTSNADIIDIRRVAVEINLKTEITSMFRPKDGPRQLPTLLLYNERGLQLFERITYLEEYYLTNDEIKILTKHATEMASFIPSGAMIIELGSGNLRKVNLLLEALDNAGKAIDYYALDLSREELERTLAQVPSYKHVKCHGLLGTYDDGRDWLKAPENINKQKCILHLGSSIGNFNRSDAATFLKGFTDVLGPNDKMLIGVDACNDPARVYHAYNDKVGITHEFILNGLRNANEIIGETAFIEGDWRVIGEYVYDEEGGRHQAFYAPTRDTMVMGELIRSHDRIQIEQSLKYSKEESERLWSTAGLEQVSEWTYGNEYGLHLLAKSRMSFSLIPSVYARSALPTLDDWEALWATWDVVTRQMLPQEELLEK…	0.3777
				Methyltransferase	36	350	315	IIDIRRVAVEINLKTEITSMFRPKDGPRQLPTLLLYNERGLQLFERITYLEEYYLTNDEIKILTKHATEMASFIPSGAMIIELGSGNLRKVNLLLEALDNAGKAIDYYALDLSREELERTLAQVPSYKHVKCHGLLGTYDDGRDWLKAPENINKQKCILHLGSSIGNFNRSDAATFLKGFTDVLGPNDKMLIGVDACNDPARVYHAYNDKVGITHEFILNGLRNANEIIGETAFIEGDWRVIGEYVYDEEGGRHQAFYAPTRDTMVMGELIRSHDRIQIEQSLKYSKEESERLWSTAGLEQVSEWTYGNEYGLHL	0.3695
				DUF2260	228	350	123	GVDACNDPARVYHAYNDKVGITHEFILNGLRNANEIIGETAFIEGDWRVIGEYVYDEEGGRHQAFYAPTRDTMVMGELIRSHDRIQIEQSLKYSKEESERLWSTAGLEQVSEWTYGNEYGLHL	0.3058
				DinB_2	378	514	137	ALWATWDVVTRQMLPQEELLEKPIKLRNACIFYLGHIPTFLDIQLTKTTKQAPSEPAHFCKIFERGIDPDVDNPELCHAHSEIPDEWPPVEEILTYQETVRSRLRGLYAHGIANIPRNVGRAIWVGFEHELMHIETL	0.3603
				HX3HXE motif	506	512	7	HELMHIE
				FGE-sulfatase (1)4	573	699	127	NKHYGWDNEKPPRRVQVAAFQAQGRPITNEEYAQYLLEKNIDKLPASWARLDNENISNGTTNSVSGHHSNRTSKQQLPSSFLEKTAVRTVYGLVPLKHALDWPVFASYDELAGCAAYMGGRIPTFEE	0.4316
				FGE-sulfatase (2)5	775	874	100	ANVGFHNWHPMPITSKGNTLVGQGELGGVWEWTSSVLRKWEGFEPMELYPGYTADFFDEKHNIVLGGSWATHPRIAGRKSFVNWYQRNYPYAWVGARVVR	0.5699
A. niger	An15g05880		CAK42541	Whole protein	1	801	801	MSPLCPVVKGVDIVDIRQNDVEFSLVNDIQRGIDPPAGTCRSMPTMLLYDAQGLKLFEDITYLEEYYLTNAEIDVLRTHAKRIVERIPDNAQLLELGSGNLRKIEILLQEFEAASKKVDYYALDLSLSELERTFSEVSLDQYQYVKLHGLHGTYDDALTWLENPANRKVPTVIMSMGSSIGNFDRPAAAKFLSQFARLLGPSDLMVLGLDSCTDSDKVYKAYNDSKGITRQFYENGLLHANAVLGYEAFKLDEWDIVTEYDNVEGRHQAFYAPNRDVTINGVLLQKGEKLIFEEAFKYDPEQCDQLWHDAGLIEDAEFGNESGDYLIHVLSSASLNFSTRPSQYAAQSIPSFEEFQSLWTAWDIVTKAMVPREELLSKPIKLRNALIFYLGHIPTFLDV…	0.3472
				Methyltransferase	13	328	316	IVDIRQNDVEFSLVNDIQRGIDPPAGTCRSMPTMLLYDAQGLKLFEDITYLEEYYLTNAEIDVLRTHAKRIVERIPDNAQLLELGSGNLRKIEILLQEFEAASKKVDYYALDLSLSELERTFSEVSLDQYQYVKLHGLHGTYDDALTWLENPANRKVPTVIMSMGSSIGNFDRPAAAKFLSQFARLLGPSDLMVLGLDSCTDSDKVYKAYNDSKGITRQFYENGLLHANAVLGYEAFKLDEWDIVTEYDNVEGRHQAFYAPNRDVTINGVLLQKGEKLIFEEAFKYDPEQCDQLWHDAGLIEDAEFGNESGDYLIH	0.3255
				DUF2260	208	329	122	GLDSCTDSDKVYKAYNDSKGITRQFYENGLLHANAVLGYEAFKLDEWDIVTEYDNVEGRHQAFYAPNRDVTINGVLLQKGEKLIFEEAFKYDPEQCDQLWHDAGLIEDAEFGNESGDYLIHV	0.2623
				DinB_23	357	493	137	SLWTAWDIVTKAMVPREELLSKPIKLRNALIFYLGHIPTFLDVHLTRALGEKPTHPKSYRLIFERGIDPDVDDPEKCHSHSEIPDEWPALGDILDYQVRVRSRVRSIFQKHNVAENRVLGEALWIGFEHEAMHLETF	0.3529
				HX3HXE motif	485	491	7	HEAMHLE
				FGE-sulfatase	554	799	246	FGWDNEKPQRKITVKAFEAQARPITNGEYAKYLQANQLPQKPESWVLIKPETYPTCNGVSQDGSYATNEFMAHFAVRTVFGSVPLELAQDWPVIASYDELAKYAKWVDCRIPTFEEAKSIYAHAARLKETSHGLNESLPVFVELDNCNVGFKHWHPTPVIQNGDRLAGHGELGGVWEWTSTELAPHEGFEAMQIYPGYTSDFFDGKHNIILGGSWATHPRIAGRTTFVNWYQRNYPYPWAGARLVR	0.436
A. oryzae	Ao090012000265		BAE60470	Whole protein	1	845	845	MSPLALSPKTVDIVNIFQNDVEFSLVNEIHKGISPPAGVRKSMPTMLLYDANGLKLFEKITYVKEYYLTNAEIEVLETNSRRIVERIPDNAQLLELGSGNLRKIEILLREFERVGKRVDYYALDLSLSELQRTFAEVSIDDYTHVGLHGLHGTYDDAVTWLNSPENRKRPTVIMSMGSSLGNFDRPGAAKFLSQYASLLGPSDMMIIGLDGCKDPGKVYRAYNDSEGVTRQFYENGLVHANVVLGYEAFKPDEWEVVTDYDAVEGRHWAAYSPRRDVTINGVLLKKGEKLFFEEAYKYGPEERDQLWRDAKLLQSTEVGNGSDDYHLHLLTSAALNLPTSPSQYAAHPIPSFEEWQSLWTAWDNATKAMVPREELLSKPIKLRNSLIFYLGHIPTFLDI…	0.3518
				Methyltransferase	13	329	317	IVNIFQNDVEFSLVNEIHKGISPPAGVRKSMPTMLLYDANGLKLFEKITYVKEYYLTNAEIEVLETNSRRIVERIPDNAQLLELGSGNLRKIEILLREFERVGKRVDYYALDLSLSELQRTFAEVSIDDYTHVGLHGLHGTYDDAVTWLNSPENRKRPTVIMSMGSSLGNFDRPGAAKFLSQYASLLGPSDMMIIGLDGCKDPGKVYRAYNDSEGVTRQFYENGLVHANVVLGYEAFKPDEWEVVTDYDAVEGRHWAAYSPRRDVTINGVLLKKGEKLFFEEAYKYGPEERDQLWRDAKLLQSTEVGNGSDDYHLHL	0.3221
				DUF2260	208	329	122	GLDGCKDPGKVYRAYNDSEGVTRQFYENGLVHANVVLGYEAFKPDEWEVVTDYDAVEGRHWAAYSPRRDVTINGVLLKKGEKLFFEEAYKYGPEERDQLWRDAKLLQSTEVGNGSDDYHLHL	0.2541
				DinB_23	357	493	137	SLWTAWDNATKAMVPREELLSKPIKLRNSLIFYLGHIPTFLDIHLTRALRGKLTEPKSYKLIFERGIDPDVDDPQKCHSHSEIPDEWPALDDILDYQERVRSRVRSIYQIEGLAENRILGEALWIGFEHEVMHLETF	0.3657
				HX3HXE motif	485	491	7	HEVMHLE
				FGE-sulfatase	552	843	292	PTTYGWDNEKPARTVTVPAFEAQGRPITNGEYAKYLQANQSRRRPASWVLTHSDENYPIPMAVNGSSVGATQDFMSNFAVRTVFGPVPLEFAQDWPVMASYDELAEYAEWVGCRIPTFEETRSIYLHSALLKERGGVNHNGEPNGHSVNGYLNGMNGNSYSKINPGKPRTPDHQPVQYPSRDALPVFLDLDGLNVGFKHWHPTPVIQNGDRLAGQGELGGAWEWTSTPLAPHDGFKAMEIYPGYTSDFFDGKHNIILGGSWATHPRVAGRTTFVNWYQHNYPYTWAGARLVR	0.4265
U. maydis	UM00197		EAK81582	Whole protein	1	1260	1260	MAPSAVALAPSAVDPTSVDNEALKANAKAHAASDSDTNLCDAPVIDLYSGSAGSLSSTSTDDQLRLDIIAGLQSNQLVIPGKENDPEDNKFAYRKTLPTTILYDEQGLILYDKLTAAPEYYLYNAELQILKDHGSEIALRIFGHPTVTAEQQSAATTGHRNGSKRDRQEAPEDDALPPQRDTTSSPKERWGDNGVGKHNGGVNAEEGLDGDRAVGAGSLVELGAGSLKKTIHLLRALKLLPALASGGPSVHYYALDLDKAELERTLRDLRSQEATNDDQNAWTIHAGKVGINGLWATYDAGLEFIGKGGLRAASTAAGAQEEGQRCLLWLGSSIGNFDRKSAAEFLAKTARESMRAGDTMLISIDRRNKPADVALAYNDPAGLTRDFIINGLDHANRVL…	0.3338
				Methyltransferase (1)6	95	138	44	KTLPTTILYDEQGLILYDKLTAAPEYYLYNAELQILKDHGSEIA
				Methyltransferase (2)	219	490	272	LVELGAGSLKKTIHLLRALKLLPALASGGPSVHYYALDLDKAELERTLRDLRSQEATNDDQNAWTIHAGKVGINGLWATYDAGLEFIGKGGLRAASTAAGAQEEGQRCLLWLGSSIGNFDRKSAAEFLAKTARESMRAGDTMLISIDRRNKPADVALAYNDPAGLTRDFIINGLDHANRVLGGNAIDSTKFEYFDRYNAREGRHESYYRATEAQTIRVRGSCESIAIEKGELIHMEASYKFGERETLNLFDYAGLRVIQRWSDKTDRYDIWL
				DUF2260	363	490	128	SIDRRNKPADVALAYNDPAGLTRDFIINGLDHANRVLGGNAIDSTKFEYFDRYNAREGRHESYYRATEAQTIRVRGSCESIAIEKGELIHMEASYKFGERETLNLFDYAGLRVIQRWSDKTDRYDIWL	0.2857
				DinB_23	558	689	132	TLTMIPHDMLHEKPIDLRHICLFYLGHIPAFIDIHVSMHLEQPHTNNRFSAIFERGIDPHMDDVTQCNPHSQVPTKPEDWPTLREILDYQQVVQGRVQRIYEDVGRGDLVMNRRLARMLWMTLEHVNLHLET	0.3175
				HX3HXE motif	682	688	7	HVNLHLE
				FGE-sulfatase (1)	777	873	97	FGWDNEHPRRRVETKAFSISALPISNAQYRDFLSATNSTDAPSSWIKSGADGSFSVRTFYGAVDMTVAQHWPVQASGKQLQAYAAWKGGRLPSHAEL
				FGE-sulfatase (2)	1156	1258	103	ANVGFRNWHPVPAALPRYDSDGTLLPGHNGGVWEWTSTPFMAYEGFRPSALYPGYSSDFFDGKHSVVIGGSFATAPTIAGRRTVVNYYQTAYPYIFGGGRVAW
				Nucleoside deaminase7	938	1061	124	MREALVMAQEALDANEVPVGGVFVRKGEVIARGRNRTNELMNATRHAELEAIDHILSVMPPSAPDFAVAPHSGPEGDNPFKDTTLYVTIEPCIMCGAALRQIGIGRVVFGAGNERFGGNGSVLG
1 http://www.ncbi.nlm.nih.gov/cdd/
2 % identity calculated by comparison to corresponding sequence in S. pombe Egt1 using the Clustal-Omega algorithm (http://www.ebi.ac.uk/Tools/msa/clustalo/) with default parameters
3 Domain not annotated in CDD, found by homology to N. crassa DinB_2
4 Homologous to S. pombe Egt1 region 559…655
5 Homologous to S. pombe Egt1 region 680…772
6 First part of methyltransferase domain not annotated in CDD, found by homology to N. crassa methyltrasferase
7 Non-homologous domain, specific to U. maydis
