# Supplementary material for: Genetic and Metabolomic Dissection of the Ergothioneine and Selenoneine Biosynthetic Pathway in the Fission Yeast, S. pombe, and Construction of an Overproduction System
Source: PLoS One. 2014 May 14;9(5):e97774. doi: 10.1371/journal.pone.0097774 (PMC4020840; doi:10.1371/journal.pone.0097774)
Supplement: Table S5 — Locations and amino acid sequences of conserved protein domains of Egt2 homologs shown in Table 2 and Figure S5. (XLSX) [file pone.0097774.s016.xlsx]

## Sheet: S. pombe Egt2 homologs
Supplemental Table S5. Locations and amino acid sequences of conserved protein domains of Egt2 homologs shown in Table 2 and Supplementary Figure S5.
Species	Locus name	Gene name	NCBI Accession #	Annotation using NCBI Conserved Domains Database (CDD)1				Amino acid sequence	% identity2
				Domain	Start	End	Length
S. pombe	SPBC660.12c	Egt2	CAA22532	Whole protein	1	392	392	MAENNVYGHEMKKHFMLDPDYVNVNNGSCGTESLAVYNKHVQLLKEAQSKPDFMCNAYMPMYMEATRNEVAKLIGADSSNIVFCNSATDGISTVLLTFPWEQNDEILMLNVAYPTCTYAADFAKNQHNLRLDVIDVGVEIDEDLFLKEVEQRFLQSKPRAFICDILSSMPVILFPWEKVVKLCKKYNIVSIIDGAHAIGHIPMNLANVDPDFLFTNAHKWLNSPAACTVLYVSAKNHNLIEALPLSYGYGLREKESIAVDTLTNRFVNSFKQDLPKFIAVGEAIKFRKSIGGEEKIQQYCHEIALKGAEIISKELGTSFIKPPYPVAMVNVEVPLRNIPSIETQKVFWPKYNTFLRFMEFKGKFYTRLSGAVYLEESDFYYIAKVIKDFCSL
				Cysteine desulfurase	23	390	368	NVNNGSCGTESLAVYNKHVQLLKEAQSKPDFMCNAYMPMYMEATRNEVAKLIGADSSNIVFCNSATDGISTVLLTFPWEQNDEILMLNVAYPTCTYAADFAKNQHNLRLDVIDVGVEIDEDLFLKEVEQRFLQSKPRAFICDILSSMPVILFPWEKVVKLCKKYNIVSIIDGAHAIGHIPMNLANVDPDFLFTNAHKWLNSPAACTVLYVSAKNHNLIEALPLSYGYGLREKESIAVDTLTNRFVNSFKQDLPKFIAVGEAIKFRKSIGGEEKIQQYCHEIALKGAEIISKELGTSFIKPPYPVAMVNVEVPLRNIPSIETQKVFWPKYNTFLRFMEFKGKFYTRLSGAVYLEESDFYYIAKVIKDFC
				Catalytic residue	219	219	1	K
S. japonicus	SJAG_03856		EEB08691	Whole protein	1	395	395	MEGKDSKAVVFGHALKKEFFVDDNVVCANTGSFGTVCRQAFAATEEAVKVSQKNTDLGFLYELPRRMRRLRSRVAEFVGAKESDIAFVGTATHAVSTILLTHPWKQGDRLLMLSLAYPTCSFAADYVRDRYGVEIELIDVDVDFDGEEFLKTVRERFEAFRPKMFLFDLISSMPVVLTPWEKVVELCREYNVLSVVDGAHSVGLLDLNLDKVQPDFFFTNTHKWLFAPSGTTILYVSEKNHSLIDPLPLSYGYGYRKEDAKPAAPFAERFRFSTYMDSAKYLGIEGALDFRATLGEEAIRRYTNEIANKGAKIVADALGVPFTPAPFPLSMVNVELPIKEVPALATEEFWKKHNTFVRTCEYKGKWYTRICGCIFMEESDYERVAVALKELCGVN	0.441
				Cysteine desulfurase	74	392	319	VAEFVGAKESDIAFVGTATHAVSTILLTHPWKQGDRLLMLSLAYPTCSFAADYVRDRYGVEIELIDVDVDFDGEEFLKTVRERFEAFRPKMFLFDLISSMPVVLTPWEKVVELCREYNVLSVVDGAHSVGLLDLNLDKVQPDFFFTNTHKWLFAPSGTTILYVSEKNHSLIDPLPLSYGYGYRKEDAKPAAPFAERFRFSTYMDSAKYLGIEGALDFRATLGEEAIRRYTNEIANKGAKIVADALGVPFTPAPFPLSMVNVELPIKEVPALATEEFWKKHNTFVRTCEYKGKWYTRICGCIFMEESDYERVAVALKELC	0.4796
				Catalytic residue	223	223	1	K
S. octosporus	SOCG_02548		EPX75072	Whole protein	1	396	396	MSQEVPFGHALTRHFMLDENYVSVNNASCGVVCVPAFQQHIRLLEESEKVQDLQTRYRLPKLAEQTLNQIAELLDTSPSNLAFCFSATQAISSILLTFPWTPNDRILTLNLAYPTCQFAVDFVRDRHGIQVDTIDIDLAYNRLELLSQIESYLEKNKPRVFVFDFVTSMPVVQLPCKEIVQICKKYNVISVIDAAHGIGLCPLSLSSLDPDFLYTNAHKWLNAPSGTTILYVSEKYHDSIEALPISYGYHIRKENSPPADALNVRFLYASSTDLPKYIAIKDAIAFRKSIGGEHKIQSYNYQIAIKGAKIIAEALGTSYFALAPPIAMVNVEIPLRCIPSSSFLEEFWQKKNTFLRFVKYHGKIYTRIAGAPFLEESDFLYTVDVLKELCQFSHES	0.4923
				Cysteine desulfurase3	58	300	243	RLPKLAEQTLNQIAELLDTSPSNLAFCFSATQAISSILLTFPWTPNDRILTLNLAYPTCQFAVDFVRDRHGIQVDTIDIDLAYNRLELLSQIESYLEKNKPRVFVFDFVTSMPVVQLPCKEIVQICKKYNVISVIDAAHGIGLCPLSLSSLDPDFLYTNAHKWLNAPSGTTILYVSEKYHDSIEALPISYGYHIRKENSPPADALNVRFLYASSTDLPKYIAIKDAIAFRKSIGGEHKIQSYN	0.5021
				Catalytic residue	219	219	1	K
N. crassa	NCU11365		EDO65040	Whole protein	1	473	473	MVATTVELPLQQKADAAQTVTGPLPFGNSLLKEFVLDPAYRNLNHGSFGTIPSAIQQKLRSYQTAAEARPCPFLRYQTPVLLDESRAAVANLLKVPVETVVFVANATMGVNTVLRNIVWSADGKDEILYFDTIYGACGKTIDYVIEDKRGIVSSRCIPLIYPAEDDDVVAAFRDAIKKSREEGKRPRLAVIDVVSSMPGVRFPFEDIVKICKEEEIISCVDGAQGIGMVDLKITETDPDFLISNCHKWLFTPRGCAVFYVPVRNQHLIRSTLPTSHGFVPQVGNRFNPLVPAGNKSAFVSNFEFVGTVDNSPFFCVKDAIKWREEVLGGEERIMEYMTKLAREGGQKVAEILGTRVLENSTGTLIRCAMVNIALPFVVGEDPKAPVKLTEKEEKDVEGL…	0.3342
				Cysteine desulfurase	77	381	305	QTPVLLDESRAAVANLLKVPVETVVFVANATMGVNTVLRNIVWSADGKDEILYFDTIYGACGKTIDYVIEDKRGIVSSRCIPLIYPAEDDDVVAAFRDAIKKSREEGKRPRLAVIDVVSSMPGVRFPFEDIVKICKEEEIISCVDGAQGIGMVDLKITETDPDFLISNCHKWLFTPRGCAVFYVPVRNQHLIRSTLPTSHGFVPQVGNRFNPLVPAGNKSAFVSNFEFVGTVDNSPFFCVKDAIKWREEVLGGEERIMEYMTKLAREGGQKVAEILGTRVLENSTGTLIRCAMVNIALPFVVGED	0.3286
				Catalytic residue	247	247	1	K
A. niger	An02g02030		CAK37505	Whole protein	1	461	461	MTTPIPYGAPMRQHFCLDPNWKNLNHGKPLPRSHSHLLKRFKPPNNDTPGSFGTYPLRVQTALRAHQSTAESHPDLFIRRLCPSQTQHSLKLLSTLLHAPESSLAFVKNATTGVNTVLHNIPFTSNDVIIYFDTIYGAIEYGLLALQERTGVKLRKVEYTLPISHGEIVKRFRDVVEKVREEEGGGLNVKAAVFDMVVSVPAIRFPFEALVRECKELGVLSVVDGAHGVGMLDLDLEALGVDFLTSNLHKWLYIPRGCAVLYVAPQHQHLMRTTSPTSWGYISSAAAEEARTNGTTASAFRNLFQSTATNDDTPYLCVPEALKFREEVCGGEKAIYEYLERLANEAADVVAGVLGTEVLRDEEGLLTRCAMTNVRLPLKVGDGGDGDGYTVVEKEAVGK…	0.3036
				Cysteine desulfurase3	91	377	287	KLLSTLLHAPESSLAFVKNATTGVNTVLHNIPFTSNDVIIYFDTIYGAIEYGLLALQERTGVKLRKVEYTLPISHGEIVKRFRDVVEKVREEEGGGLNVKAAVFDMVVSVPAIRFPFEALVRECKELGVLSVVDGAHGVGMLDLDLEALGVDFLTSNLHKWLYIPRGCAVLYVAPQHQHLMRTTSPTSWGYISSAAAEEARTNGTTASAFRNLFQSTATNDDTPYLCVPEALKFREEVCGGEKAIYEYLERLANEAADVVAGVLGTEVLRDEEGLLTRCAMTNVRLP	0.2996
				Catalytic residue	250	250	1	K
	An05g02190		CAK44880	Whole protein	1	486	486	MSKRSLLTRQWPYCLAEILNASGMVSQLSTNIHNVQMASIDASIVPFGAAMREQFLFDPNFLNLNHGSFGTYPAAVRTALRHFQDQVEARPDPFIRYTTPKELDVSREAVAKLLNVPRSECVFVKNATTGVNTVLHNLSFKSDDVIIYFETVYGALEKGIVSFIESRAAQIRKVRYEMPTSHENLVDRFLQVVREARSEGLNVKLALFDVVTSLPAVRFPFERLTEVCREEGILSLIDGAHGIGQLPLDLGKLQPDFFTSNCHKWLFVPRSCCVLYVPKRNQHLIRTTIPTSWGFIPSEDSPATAPSVMKSDDVTKSAFESLFEFVATNDDTPYFCVPAALEFRKTICGGEKRIYEYLERLANEAADIVAAALGTDVMEERDLQPGKQSNLRRCAMSTV…	0.3171
				Cysteine desulfurase	49	475	427	AAMREQFLFDPNFLNLNHGSFGTYPAAVRTALRHFQDQVEARPDPFIRYTTPKELDVSREAVAKLLNVPRSECVFVKNATTGVNTVLHNLSFKSDDVIIYFETVYGALEKGIVSFIESRAAQIRKVRYEMPTSHENLVDRFLQVVREARSEGLNVKLALFDVVTSLPAVRFPFERLTEVCREEGILSLIDGAHGIGQLPLDLGKLQPDFFTSNCHKWLFVPRSCCVLYVPKRNQHLIRTTIPTSWGFIPSEDSPATAPSVMKSDDVTKSAFESLFEFVATNDDTPYFCVPAALEFRKTICGGEKRIYEYLERLANEAADIVAAALGTDVMEERDLQPGKQSNLRRCAMSTVRLPFTFREDLAASDSTVTLLRADEAGAVVRWFQTTLVEEHGTFVPFVE…	0.3214
				Catalytic residue	264	264	1	K
A. oryzae	Ao090026000291		BAE59766	Whole protein	1	461	461	MTTPFGAPMREHFLFDTKFKNLNHGSFGTYPRAVQTALRQHQHSAEARPDLFYRITRGQGIDESRRIVANLLNIPVNECVFVKNATTGVATVLRNLVFQKGDTVVYFDTIYGAVEKNVHSIMESSPVTTRKVEYALPVSHEDLVKRFQDVVSRARGEGLNVKVAVFDTIVSMPGVRFPFEALVEVCREEGILSLVDGAHGIGHIPLDLGALRPDFFTSNLHKWLFVPRGCAVLHVPLRNQHLIRTTFPTSWGYIPPPSSGEITPTTTQGKSAFEYLFEYISTTDDTPWLCVPAAMKFRTEVCGGEDRIYAYLETLAREAGDIVARALGTEVMQEAGLKEGEASQLRRCGMATVRLPIAVSSSSDAGSGRGGDAVMRVQGEDGTSYLRIQASLVATVSNW…	0.2846
				Cysteine desulfurase3	58	319	262	GQGIDESRRIVANLLNIPVNECVFVKNATTGVATVLRNLVFQKGDTVVYFDTIYGAVEKNVHSIMESSPVTTRKVEYALPVSHEDLVKRFQDVVSRARGEGLNVKVAVFDTIVSMPGVRFPFEALVEVCREEGILSLVDGAHGIGHIPLDLGALRPDFFTSNLHKWLFVPRGCAVLHVPLRNQHLIRTTFPTSWGYIPPPSSGEITPTTTQGKSAFEYLFEYISTTDDTPWLCVPAAMKFRTEVCGGEDRIYAYLETLAREA	0.2823
				Catalytic residue	222	222	1	K
U. maydis	UM04128		EAK85156	Whole protein	1	465	465	MVVRLPLEERIAAHRQALLSKPFPGFGHALKPYYGFDPSYVPLNNGSFGACPIYVLDIIKELLDEAERRPDVFLRKQYQSLLDHARKEVAGIVRCDVADLVFVNNATSGVNAILRGLNGTWKKRDAILVYDTVYGACGKTAQYIVDSNPSFELQLVTLPLSYPLTHDEVLAKTKQTILDAESKGIKIRVGIVDAISSVPGVIVPWEKITTLFRQHGILSLIDGAHAVGQIPLNLRQADPDFFISNCHKWLSAHRGCAFLYAPKRNQQFAQAIPTSHFYLSPNVPKSNAPDLIPTNAPSNWVATWEWTGTIDLSNYLSVPAAIEFRKWMGGEDAVMQHNAQLARRAGEIVSSRLGKGSEVMEIETPTESERLTASMVNISVPITLPKSSSNLSAEEVNVQ…	0.324
				Cysteine desulfurase3	76	381	306	KQYQSLLDHARKEVAGIVRCDVADLVFVNNATSGVNAILRGLNGTWKKRDAILVYDTVYGACGKTAQYIVDSNPSFELQLVTLPLSYPLTHDEVLAKTKQTILDAESKGIKIRVGIVDAISSVPGVIVPWEKITTLFRQHGILSLIDGAHAVGQIPLNLRQADPDFFISNCHKWLSAHRGCAFLYAPKRNQQFAQAIPTSHFYLSPNVPKSNAPDLIPTNAPSNWVATWEWTGTIDLSNYLSVPAAIEFRKWMGGEDAVMQHNAQLARRAGEIVSSRLGKGSEVMEIETPTESERLTASMVNISVP	0.3309
				Catalytic residue	248	248	1	K
1 http://www.ncbi.nlm.nih.gov/cdd/
2 % identity calculated by comparison to corresponding sequence in S. pombe Egt2 using the Clustal-Omega algorithm (http://www.ebi.ac.uk/Tools/msa/clustalo/) with default parameters
3 Domain annotated as 'Aspartate aminotransferase superfamily' in CDD
